# Supplementary material for: A miR-146a-5p/TRAF6/NF-kB p65 axis regulates pancreatic cancer chemoresistance: functional validation and clinical significance
Source: PubMed Central journal article supplement (PMC7086345; doi:10.7150/thno.40566), 2020-03-04
Supplement: thnov10p3967s1.pdf [file thnov10p3967s1.pdf]

### Supplementary figure legends

**Figure S1.** PDAC cell line models (MiaPaCa-2-GR and SW1990-GR cells) with acquired GEM resistance were constructed. (A) The parental cells (PA cells) were cultured with increasing GEM doses over a period of approximately 6 months. (B-C) The inhibitory concentration ( $IC_{50}$ ) of GEM of the resistant cells was determined by using CCK-8 assays, and the GR cells were more resistant than the PA cells ( $P < 0.05$ ). (D) Our qRT-PCR data showed low miR-146a-5p expression in the GR cell lines compared with the expression in the corresponding PA cells.

**Figure S2.** MiR-146a-5p sensitizes the chemotherapeutic efficacy of SW1990 cells *in vivo*. (A) Representative images showing the tumors formed in the four groups ( $n = 5$  for each group). (B) Tumor growth curves were drawn according to the tumor volumes measured (\*\* $P < 0.01$ , \*\*\* $P < 0.001$ ). (C) Tumor weights of the four groups were measured at the 5th week after subcutaneous transplantation (\*\* $P < 0.01$ , \*\*\* $P < 0.001$ ). (D-E) Representative tumor tissue sections of the xenografts from four groups were analyzed for the proliferation marker Ki-67 using IHC, and the percentages of Ki67-positive cells were measured (scale bar, 40  $\mu\text{m}$ , \*\* $P < 0.01$ ).

**Figure S3.** The increased TRAF6 in PDAC tissues is associated with clinicopathological features. (A) TCGA and genotype-tissue expression project (GTEx) databases also showed increased TRAF6 in PDAC tissues compared with that in normal tissues. (B) Representative images of high and low expression of TRAF6 in TMA analysis by IHC staining. (C) There was obvious relationship between TRAF6 expression and clinicopathological features, such as differentiation, positive lymph nodes, and TNM stage. Statistical significance was determined by the  $\chi^2$ -test.

**Figure S1**

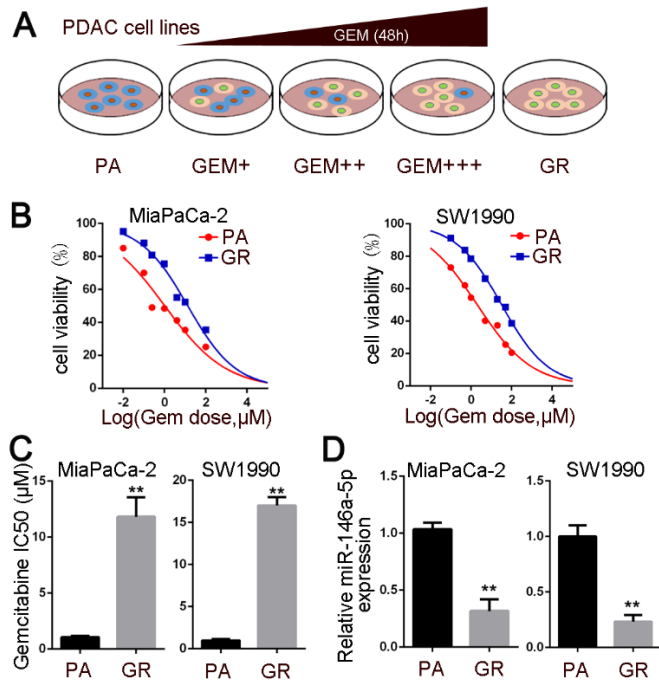

**Figure S2**

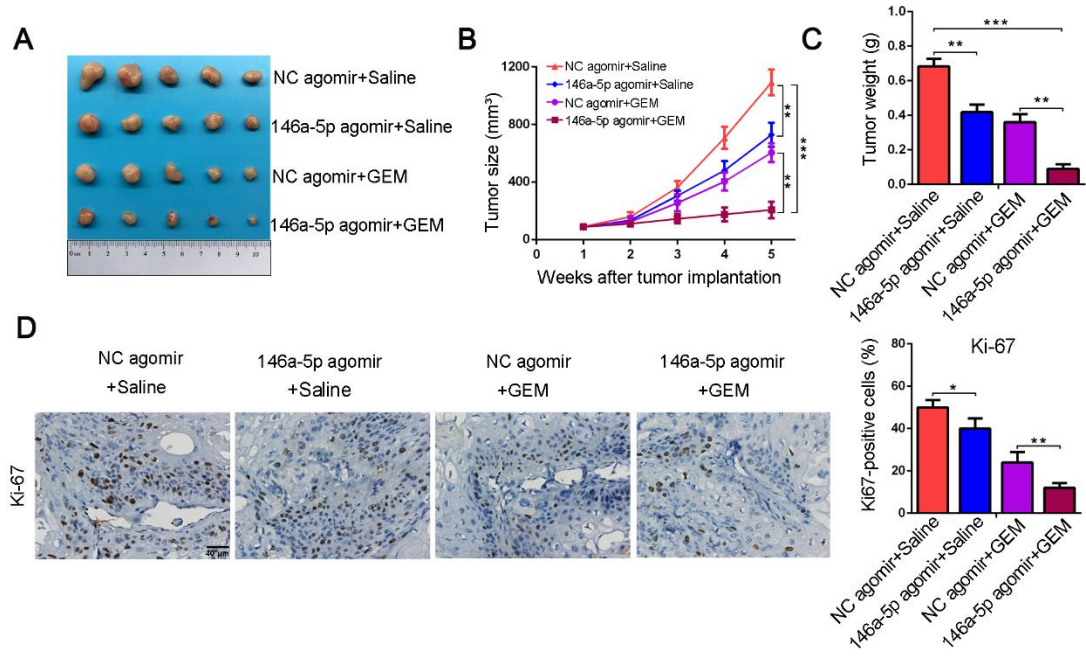

**Figure S3**

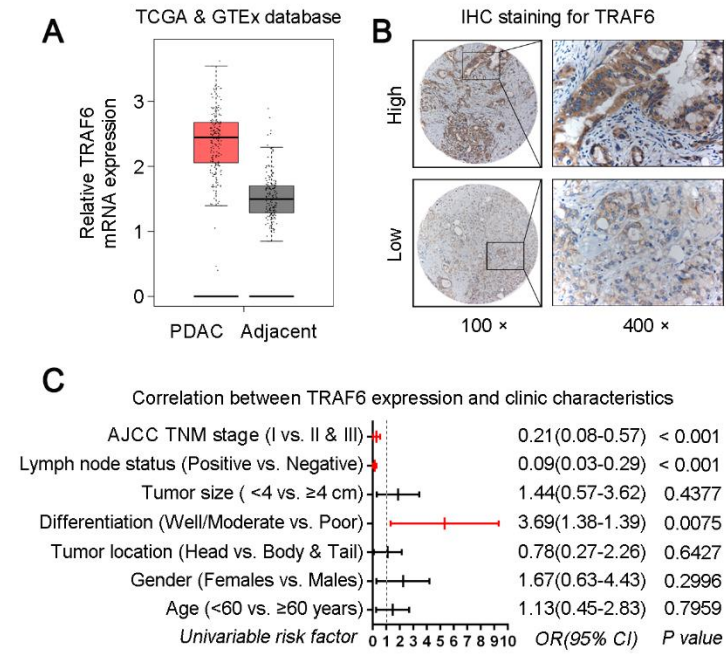

**Table S1. Primer sequences used in the study.**

| <b>Genes (<i>Homo sapiens</i>)</b> | <b>Primers</b> | <b>Sequences</b>              |
|------------------------------------|----------------|-------------------------------|
| miR-146a-5p                        | Forward        | 5'-CGCGTGAGAACTGAATTCCA-3     |
|                                    | (Stem-loop)    | 5'-AGTGCAGGGTCCGAGGTATT-3     |
| <i>TRAF6</i>                       | Forward        | 5'-GCCCATGCCGTATGAAGAGA-3'    |
|                                    | Reverse        | 5'-ACTGAATGTGCAGGGGACTG-3'    |
| <i><math>\beta</math>-actin</i>    | Forward        | 5'-CTACGTCGCCCTGGACTTCGAGC-3' |
|                                    | Reverse        | 5'-GATGGAGCCGCCGATCCACACGG-3' |

**Table S2. Clinicopathological features and correlation of miR-146a-5p expression in PDAC tissue samples.**

| Characteristics              | No. of             | miR-146a-5p              |                           | P value |
|------------------------------|--------------------|--------------------------|---------------------------|---------|
|                              | patients<br>(n=93) | Low expression<br>(n=60) | High expression<br>(n=33) |         |
| <b>Age</b>                   |                    |                          |                           |         |
| <60 years, n (%)             | 39(41.93)          | 25(41.66)                | 14(42.42)                 | 0.9435  |
| ≥60 years, n (%)             | 54(58.07)          | 35(58.34)                | 19(57.58)                 |         |
| <b>Gender</b>                |                    |                          |                           |         |
| Female, n (%)                | 45(48.39)          | 28(46.67)                | 17(51.52)                 | 0.6544  |
| Male, n (%)                  | 48(51.61)          | 32(53.33)                | 16(48.48)                 |         |
| <b>Tumor location</b>        |                    |                          |                           |         |
| Head, n (%)                  | 58(62.36)          | 33(55.00)                | 24(72.73)                 | 0.0931  |
| Body and Tail, n (%)         | 35(37.64)          | 27(45.00)                | 9(27.27)                  |         |
| <b>Tumor size</b>            |                    |                          |                           |         |
| <4.0 cm, n (%)               | 69(74.19)          | 45(75.00)                | 24(72.73)                 | 0.8106  |
| ≥4.0 cm, n (%)               | 24(25.81)          | 15(25.00)                | 9(27.27)                  |         |
| <b>Lymph node status</b>     |                    |                          |                           |         |
| Negative, n (%)              | 56(60.22)          | 34(56.67)                | 22(66.67)                 | 0.3458  |
| Positive, n (%)              | 37(39.78)          | 26(43.33)                | 11(33.33)                 |         |
| <b>Tumor differentiation</b> |                    |                          |                           |         |
| Well/Moderate, n (%)         | 56(60.22)          | 36(60.00)                | 20(60.61)                 | 0.9544  |
| Poor, n (%)                  | 37(39.78)          | 24(40.00)                | 13(39.39)                 |         |
| <b>TNM Stage</b>             |                    |                          |                           |         |
| I, n (%)                     | 33(35.48)          | 19(31.67)                | 14(42.42)                 | 0.2995  |
| II and III, n (%)            | 60(64.52)          | 41(68.33)                | 19(57.58)                 |         |

**Table S3. Univariate and multivariate Cox regression of overall survival for patients with PDAC.**

| Characteristics               | Univariate |              |                | Multivariate |              |                |
|-------------------------------|------------|--------------|----------------|--------------|--------------|----------------|
|                               | HR         | 95% CI       | <i>P</i> value | HR           | 95% CI       | <i>P</i> value |
| <b>Age</b>                    |            |              |                |              |              |                |
| < 60 years                    | 0.75       | 0.47 to 1.19 | 0.1098         |              |              |                |
| ≥ 60 years                    |            |              |                |              |              |                |
| <b>Gender</b>                 |            |              |                |              |              |                |
| Female                        | 1.09       | 0.69 to 1.73 | 0.7089         |              |              |                |
| Male                          |            |              |                |              |              |                |
| <b>Tumor location</b>         |            |              |                |              |              |                |
| Head                          | 1.18       | 0.75 to 1.87 | 0.4795         |              |              |                |
| Body and Tail                 |            |              |                |              |              |                |
| <b>Tumor size</b>             |            |              |                |              |              |                |
| ≥4.0 cm                       | 0.43       | 0.24 to 0.78 | 0.0126         | 2.03         | 1.23 to 3.35 | 0.0060         |
| <4.0 cm                       |            |              |                |              |              |                |
| <b>Tumor differentiation</b>  |            |              |                |              |              |                |
| Well/Moderate                 | 0.80       | 0.49 to 1.29 | 0.1327         |              |              |                |
| Poor                          |            |              |                |              |              |                |
| <b>Lymph node status</b>      |            |              |                |              |              |                |
| Positive                      | 0.35       | 0.20 to 0.60 | < 0.001        |              |              |                |
| Negative                      |            |              |                |              |              |                |
| <b>TNM Stage</b>              |            |              |                |              |              |                |
| I                             | 0.38       | 0.23 to 0.61 | < 0.001        | 2.43         | 1.51 to 3.93 | < 0.001        |
| II and III                    |            |              |                |              |              |                |
| <b>miR-146a-5p expression</b> |            |              |                |              |              |                |
| Low                           | 0.57       | 0.36 to 0.90 | 0.0185         | 0.54         | 0.33 to 0.88 | 0.0140         |
| High                          |            |              |                |              |              |                |

**Table S4. The potential targets of microRNA-146a-5p**

| TargetScan | miRanda  | PicTar   | RNA22    | PITA      |
|------------|----------|----------|----------|-----------|
| IGSF1      | NOVA1    | PPP1R11  | IRAK1    | TRAF6     |
| KBTBD4     | RHOXF2B  | NFAT5    | TRAF6    | SRSF6     |
| PSMA4      | RHOXF2   | PAPPA    | NOTCH1/2 | SEC23IP   |
| CDKN2AIP   | TPM1     | ZDHHC17  | EGFR     | NOVA1     |
| ZBTB2      | TRAF6    | SORT1    | RPA3     | WWC2      |
| IRAK1      | ZNF826   | RNF31    | CHOP     | UPP2      |
| SLC10A3    | IGSF1    | CNTNAP2  | BRCA1    | PPP1R11   |
| HNRNPD     | PCGF5    | NF2      | ALOX5AP  | BCORL1    |
| ZDHHC13    | ZNF253   | ELAVL1   | SMAD4    | SORT1     |
| NOVA1      | ZNF90    | HIPK1    | ST8SIA4  | ZNF649    |
| TRAF6      | LIN52    | GAD1     | LIN52    | PLSCR4    |
| TDRKH      | TMEM185B | SON      | ATG12    | NUMB      |
| AC012215.1 | ITCH     | PIP5K2B  | CXCR4    | USP32     |
| TMEM120B   | PHC1     | STC1     | RHOA     | APPL1     |
| RARB       | ABCD3    | EIF5A2   | SOD2     | ZNF652    |
| LFNG       | CMAH     | ZAK      | RAC1     | SIAH2     |
| CD80       | LRRTM3   | PTGFRN   | HAb18G   | IRAK1     |
| ACKR2      | PMS1     | HSHIN1   | PTGS2    | CARD10    |
| NUMB       | TFAP2D   | PRX      | L1CAM    | GDAP1L1   |
| KLF7       | LRCH1    | SDFR1    | COPS8    | EIF4G2    |
| NUDT17     | MGC11082 | EFNB2    | CARD10   | GRIA3     |
| NRAS       | TMEM19   | TRAF6    | PRKCE    | MRS2      |
| EIF4G2     | ADRB2    | NOVA1    | UHRF1    | ZNF354B   |
| ZSCAN29    | RASGRP1  | MXD4     | RARB     | SLC10A3   |
| USP3       | FBXL3    | ABCC12   | CCNJ     | ZNF540    |
| AFAP1L2    | LCA5L    | SYNPR    | LIN52    | TDRKH     |
| TMEM194A   | UBE2J1   | SH3GL2   | EGR1     | DDHD1     |
| ERLEC1     | RAB7L1   | RAB10    | ROCK     | BRK1      |
| FAM169A    | UHRF1    | IRAK1    | TAK1     | LOC388813 |
| FAM26E     | SLC16A14 | KIAA0141 | WASF2    | POFUT2    |



**Table S5. Clinicopathological features and correlation of TRAF6 expression in PDAC tissue samples.**

| <b>Characteristics</b>       | <b>No. of patients<br/>(n=87)</b> | <b>TRAF6 High expression<br/>(n=61)</b> | <b>TRAF6 Low expression<br/>(n=26)</b> | <b>P value</b> |
|------------------------------|-----------------------------------|-----------------------------------------|----------------------------------------|----------------|
| <b>Age</b>                   |                                   |                                         |                                        |                |
| <60 years, n (%)             | 42(48.28)                         | 30(49.18)                               | 12(46.15)                              | 0.7959         |
| ≥60 years, n (%)             | 45(51.72)                         | 31(50.82)                               | 14(53.85)                              |                |
| <b>Gender</b>                |                                   |                                         |                                        |                |
| Female, n (%)                | 34(39.08)                         | 26(42.62)                               | 8(30.77)                               | 0.2996         |
| Male, n (%)                  | 53(60.92)                         | 35(57.38)                               | 18(69.23)                              |                |
| <b>Tumor location</b>        |                                   |                                         |                                        |                |
| Head, n (%)                  | 64(73.56)                         | 44(72.13)                               | 20(76.92)                              | 0.6427         |
| Body and Tail, n (%)         | 23(26.44)                         | 17(27.87)                               | 6(23.08)                               |                |
| <b>Tumor size</b>            |                                   |                                         |                                        |                |
| <4.0 cm, n (%)               | 49(56.32)                         | 36(59.02)                               | 13(50.00)                              | 0.4377         |
| ≥4.0 cm, n (%)               | 38(43.68)                         | 25(40.98)                               | 13(50.00)                              |                |
| <b>Lymph node status</b>     |                                   |                                         |                                        |                |
| Negative, n (%)              | 22(25.28)                         | 7(11.48)                                | 15(57.69)                              | < 0.001        |
| Positive, n (%)              | 65(74.71)                         | 54(88.52)                               | 11(42.31)                              |                |
| <b>Tumor differentiation</b> |                                   |                                         |                                        |                |
| Well/Moderate, n (%)         | 61(70.11)                         | 48(78.69)                               | 13(50.00)                              | 0.0075         |
| Poor, n (%)                  | 26(29.89)                         | 13(21.31)                               | 13(50.00)                              |                |
| <b>TNM Stage</b>             |                                   |                                         |                                        |                |
| I, n (%)                     | 26(29.89)                         | 12(19.67)                               | 14(53.85)                              | < 0.001        |
| II and III, n (%)            | 61(70.11)                         | 49(80.33)                               | 12(46.15)                              |                |
